# Supplementary material
Source: PubMed Central journal article supplement (PMC6926463)
Supplement: supp_RA119.010295_154641_1_supp_428694_q0xj6l.pdf [file supp_RA119.010295_154641_1_supp_428694_q0xj6l.pdf]

Supp. Fig. 1

A

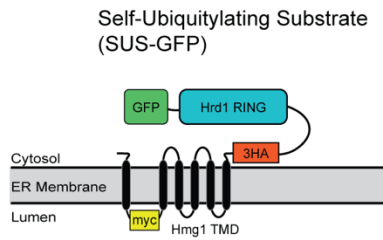

B

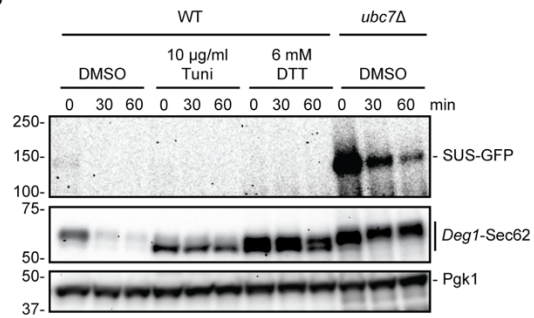

**Supporting Figure 1. ER stress does not impair degradation of a self-ubiquitylating protein possessing the Hrd1 RING domain.** (A) Schematic of the Self-Ubiquitylating Substrate (SUS-GFP) analyzed in this figure. (B) Cycloheximide chase analysis of yeast of the indicated genotypes expressing SUS-GFP cultured in the presence of 6 mM DTT, 10  $\mu$ g/ml tunicamycin, or DMSO for 1 h. DTT, tunicamycin, and DMSO were maintained at the same concentration during incubation with cycloheximide. Cells also expressed *Deg1-Sec62* as a control for ER stress induction. SUS-GFP was detected with anti-GFP antibodies. *Deg1-Sec62* was detected with peroxidase anti-peroxidase antibodies. Pgk1 served as a loading control. The experiment was performed two times.
